# Supplementary material
Source: MDPI journal article supplement (https://www.mdpi.com/2077-0472/8/11/180)
Supplement: s1 [file s1]

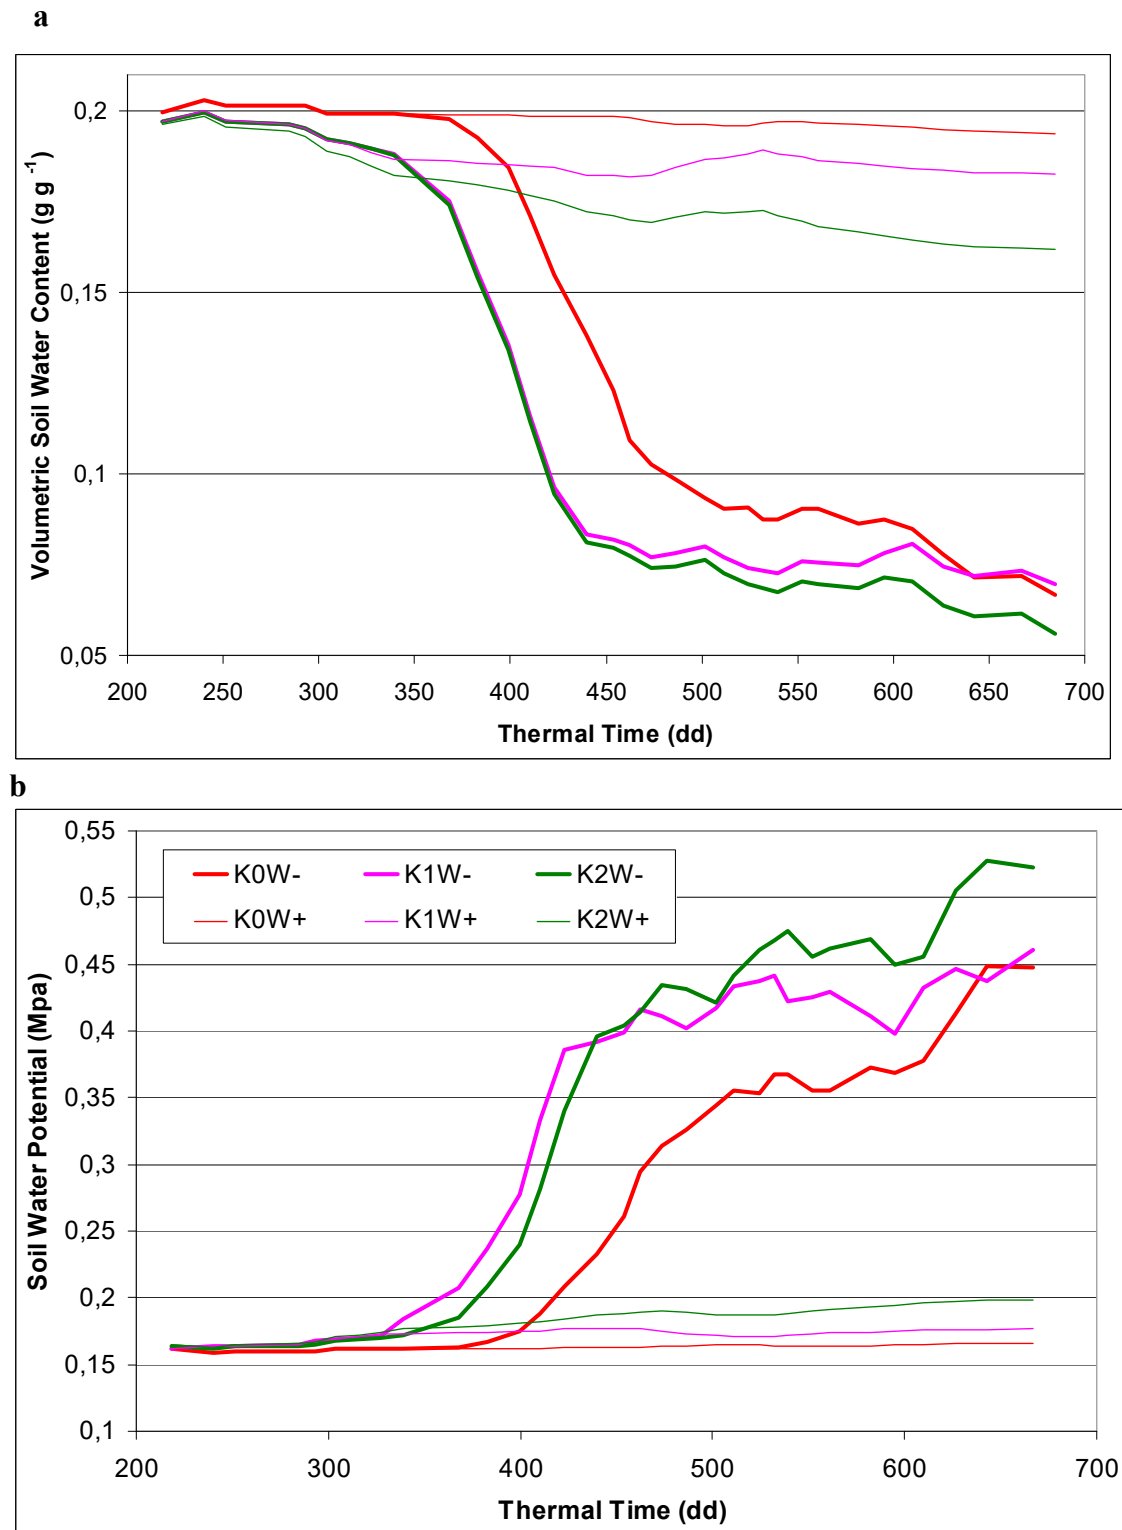

Figure S1: Evolution of a) the volumetric Soil Water Content and b) the corresponding soil water potential. The soil water content was obtained by weighing pots regularly (Equation 3). The soil water potential was obtained by pre-dawn water potentials measurements at the end of the experiment as well as by a relationship obtained between soil water content and soil water potential on a previous greenhouse-pot experiment using the same soil.
